# Supplementary material for: Dosimetric Analysis and Acute Toxicity in Craniospinal Irradiation Using Helical Tomotherapy: Experience from a Tertiary Cancer Center
Source: Research Square preprint supplement (doi:10.21203/rs.3.rs-4365851/v1), 2024-05-13
Supplement: Supplementary file 1 [file 07110543d5bf79d28ae56545.xlsx]

## Sheet: Sheet1
	Table 1: Patient characteristics, treatment details, and clinical outcomes of the study cohort
Pt No.	Age	Gender	Diagnosis	CSI Dose	Boost Region	Boost Dose	Concurrent Chemotherapy Regimen	Concurrent Chemotherapy Schedule	Adjuvant Chemotherapy	Patterns of failure	Status at last Follow up	Follow Up (Months)
1	20	Female	Medulloblastoma-HR	36Gy/20#	Posterior Fossa	18Gy/10#	Vincristine	Weekly	6 Cycles of CCV	No Progression	Alive NED	27.6
2	3	Female	Medulloblastoma-HR	36Gy/20#	Posterior Fossa	18Gy/10#	Vincristine	Weekly	1 Cycle of CCV	Died of Neutropenia	DOC	5.8
3	18	Female	Pinealoblastoma	36Gy/20#	Primary tumor bed	18Gy/10#	-	-	6 Cycles of CCV	No Progression & Residual Stable Disease	Alive SD	24.5
4	7	Female	Medulloblastoma-SR	23.4Gy/13#	Primary tumor bed	30.6Gy/17#	Vincristine	Weekly	6 Cycles of CCV	No Progression	Alive NED	23
5	2	Female	Pineal Parenchymal Tumor with Intermediate Differentiation	36Gy/20#	Primary tumor bed	18Gy/10#	-	-	5 Cycles of CCV	Died of Neutropenia	DOC	8.5
6	51	Male	Pinealoblastoma	36Gy/20#	Primary tumor bed	18Gy/10#	-	-	6 Cycles of CCV	No Progression & Residual Stable Disease	Alive SD	27.3
7	13	Female	Medulloblastoma-SR	23.4Gy/13#	Primary tumor bed	30.6Gy/17#	Vincristine	Weekly	2 Cycles of CCV	Died of Neutropenia	DOC	6.8
8	13	Female	Medulloblastoma-HR	36Gy/20#	Posterior Fossa	18Gy/10#	Vincristine	Weekly	6 Cycles of CCV & on maintainance Temozolamide	No Progression & Residual Stable Disease	Alive SD	20.9
9	28	Male	Medulloblastoma-HR	36Gy/20#	Posterior Fossa	18Gy/10#	Vincristine	Weekly	6 Cycles of CCV	No Progression	Alive NED	25.4
10	27	Male	Ependymoma with drop metastasis	36Gy/20#	Primary tumor bed + D2-D6 Spine	18Gy/10# & 14.4Gy/8#	-	-	-	No Progression & Residual Stable Disease	Alive SD	33.5
11	14	Male	Medulloblastoma-HR	36Gy/20#	Posterior Fossa	18Gy/10#	Carboplatin	Daily for 15#	6 Cycles of CCV & on maintainance Temozolamide	No Progression & Residual Stable Disease	Alive SD	21.6
12	15	Male	Medulloblastoma-SR	23.4Gy/13#	Primary tumor bed	30.6Gy/17#	Vincristine	Weekly	6 Cycles of CCV & on maintainance Temozolamide	No Progression & Residual Stable Disease	Alive SD	19.6
13	16	Female	Medulloblastoma-HR	36Gy/20#	Posterior Fossa + D3-D11 Spine	18Gy/10# & 14.4Gy/8#	Carboplatin	Daily for 15#	6 Cycles of CCV	No Progression	Alive NED	19.2
14	27	Male	Pineal Germinoma	30.6Gy/17#	Primary tumor bed	19.8Gy/11#	-	-	4 Cycles of PE	No Progression	Alive NED	18.9
15	30	Female	Pineal Parenchymal Tumor with Intermediate Differentiation	36Gy/20#	Primary tumor bed	18Gy/10#	-	-	-	Progressive LM dissemination	Alive SD	25.4
16	4	Female	Medulloblastoma-HR	36Gy/20#	Posterior Fossa	18Gy/10#	Carboplatin	Daily for 15#	6 Cycles of CCV	No Progression	Alive NED	5.8
17	26	Male	Medulloblastoma-HR	36Gy/20#	Posterior Fossa	18Gy/10#	Vincristine	Weekly	2 Cycles of CCV	No Progression	Alive NED	17.9
18	18	Male	Medulloblastoma-HR	36Gy/20#	-	-	Vincristine	Weekly	-	No Progression & Residual Stable Disease	Alive SD	20
19	4	Male	Medulloblastoma-HR	36Gy/20#	Posterior Fossa	18Gy/10#	Carboplatin	Daily for 15#	6 Cycles of CCV	No Progression	Alive NED	16.7
20	16	Male	Ependymoma with drop metastasis	36Gy/20#	-	-	-	-	2 Cycles of CCV	No Progression & Residual Stable Disease	Alive SD	20.3
21	9	Female	Medulloblastoma-HR	36Gy/20#	Posterior Fossa	18Gy/10#	Carboplatin	Daily for 15#	6 Cycles of CCV & on maintainance Temozolamide	No Progression	Alive NED	22.1
22	31	Male	Medulloblastoma-HR	36Gy/20#	Posterior Fossa	18Gy/10#	Vincristine	Weekly	6 Cycles of CCV	No Progression	Alive NED	34.5
23	3	Male	Trilateral Retinoblastoma	19.5Gy/13#	-	-	-	-	4 Cycles of TCV	Disseminated residual disease	DOD	16
24	8	Female	Sclerosing Rhabdomyosarcoma	36Gy/20#	Primary tumor bed	18Gy/10#	-	-	2 Cycles of VAC	Died of Neutropenia	DOC	6.7
			Pt - Patients
			HR - High Risk
			SR - Standard Risk
			CCV - Cisplatin, Cyclophosphamide, Vincristine
			PE - Carboplatin, Etoposide
			TCV - Topotecan, Carboplatin, Vincristine
			VAC - Vincristin, Dactinomycin, Cyclophosphamide
			NED - No Evidence of Disease
			SD - Stable Disease
			DOD - Death due to Disease
			DOC - Death due to other cause
