# Supplementary material for: Dosimetric Analysis and Acute Toxicity in Craniospinal Irradiation Using Helical Tomotherapy: Experience from a Tertiary Cancer Center
Source: Research Square preprint supplement (doi:10.21203/rs.3.rs-4365851/v1), 2024-05-13
Supplement: Supplementary file 2 [file 8c9ff79071f454ab33aea1a8.xlsx]

## Sheet: Sheet1
Comparison of PTV-Combine coverage with various studies
	Sugie et al. 39	Seravalli et al. 18	Zong-wen et al.40	Our Study
Mean Prescription Dose (Gy)	30.6	35	36	33.4
Dmean	30.6 (100%)	35.2 (100.6%)	35.9 (99.7%)	33.02 (98.9%)
V95%	95.3	98.2	99.2	98.2
V107%	0.3	-	0	0.1
CI	-	0.8	0.87	1.08
HI	-	-	1.05	1.1
