# Supplementary material for: Dosimetric Analysis and Acute Toxicity in Craniospinal Irradiation Using Helical Tomotherapy: Experience from a Tertiary Cancer Center
Source: Research Square preprint supplement (doi:10.21203/rs.3.rs-4365851/v1), 2024-05-13
Supplement: Supplementary file 3 [file 8fc576e8a2931fb736038af6.xlsx]

## Sheet: Sheet1
Comprasion of various dose constraints of OARs: Mean (SD)
Organ	Study	V80%	V50%	V20%	V10%	V5%	Integral Dose (Mean)
Eyeball R	Our Study	0.17 (0.52)	7.62 (9.16)	47.05 (14.85)	89.38 (8.23)	100 (0)	0.1
	Zong-wen et al. 40	0.29 (0.58)	25.16 (7.63)	73.99 (6.3)	97.62 (3.37)	100 (0)	-
	Sharma et al. 41	-	-	-	-	-	0.1
Eyeball L	Our Study	0.28 (0.99)	6.58 (8.85)	46.45 (13.79)	90.13 (6.85)	100 (0)	0.1
	Zong-wen et al. 40	0.03 (0.08)	22.05 (9.06)	75.64 (9.52)	96.8 (4.47)	100 (0)	-
	Sharma et al. 41	-	-	-	-	-	0.1
Lens R	Our Study	0 (0)	0 (0)	0 (0)	43 (27.3)	100 (0)	-
	Zong-wen et al. 40	0 (0)	0 (0)	0 (0)	78.17 (34.88)	100 (0)	-
Lens L	Our Study	0 (0)	0 (0)	0 (0)	46 (30.77)	100 (0)	-
	Zong-wen et al. 40	0 (0)	0 (0)	0 (0)	69.9 (36.35)	100 (0)	-
Thyroid	Our Study	1.83 (4.17)	18.15 (31.88)	63.39 (35.52)	91.41 (16.74)	100 (0)	0.1
	Sharma et al. 41	0 (0)	-	-	100 (0)	-	0.1
	Sugie et al. 39	-	0 (0)	1.2 (1.3)	22.4 (8.7)	77.8 (20.3)	-
Lung R	Our Study	0.95 (1.38)	5.55 (3.66)	31.64 (11.75)	79.09 (12.39)	99.62 (1.64)	2.2
	Zong-wen et al. 40	0.01 (0.01)	0.48 (0.54)	12.01 (6.1)	56.84 (14.69)	98.25 (3.81)	-
	Herdian et al. 43	-	-	11.59 (2.04)	-	-	-
	Sharma et al. 41	-	-	-	-	-	1.3
Lung L	Our Study	0.48 (0.84)	3.96 (3.39)	27.82 (10.48)	77.93 (11.86)	99.85 (0.31)	1.7
	Zong-wen et al. 40	0.01 (0.01)	0.2 (0.19)	8.63 (4.63)	56.32 (15.37)	98.06 (4.35)	-
	Herdian et al. 43	-	-	8.32 (1.97)	-	-	-
	Sharma et al. 41	-	-	-	-	-	1.2
Heart	Our Study	0.09 (0.32)	5.39 (7.21)	64.13 (22.24)	98.57 (2.82)	100 (0)	3.1
	Zong-wen et al. 40	0 (0)	0.24 (0.54)	21.44 (15.88)	91.07 (8.18)	100 (0)	-
	Sharma et al. 41	-	-	-	-	-	1.1
Liver	Our Study	0.18 (0.35)	3.32 (2.88)	45.53 (16.01)	87.41 (9.95)	98.26 (2.37)	7.2
	Zong-wen et al. 40	0 (0)	0 (0.01)	7.07 (4.04)	58.35 (21.37)	95.78 (9.33)	-
	Sharma et al. 41	-	-	-	-	-	2.6
