# Supplementary material for: Dosimetric Analysis and Acute Toxicity in Craniospinal Irradiation Using Helical Tomotherapy: Experience from a Tertiary Cancer Center
Source: Research Square preprint supplement (doi:10.21203/rs.3.rs-4365851/v1), 2024-05-13
Supplement: Supplementary file 4 [file bc64a6de059f7aa7814565de.xlsx]

## Sheet: Sheet1
Comparison of Dmean (Gy) of various OARs
	Sharma et al. 41	Sugie et al. 39	Schipou et al. 42	Seravalli et al. 18	Zng-wen et al. 40	Herdian et al. 43	Our Study
Eyeball R	8.2	-	9.6	-	12.1	14.3	9.6
Eyeball L	8.1	-	9.6	-	11.6	14.6	11.6
Lens R	-	-	4.5	11.1	3.8	-	3.9
Lens L	-	-	4.4	10.1	3.7	-	4.1
Parotid R	-	9.1	9.7	12.9	-	15	11.9
Parotid L	-	9.1	9.8	13.1	-	14.6	11.9
Thyroid	8.3	8.4	10.4	15.3	-	21.7	10.6
Breast R	-	-	3.5	-	-	-	1
Breast L	-	-	3.5	-	-	-	1
Lung R	6.7	6.6	6.3	9.4	4.1	-	6.3
Lung L	6.7	6.6	5.6	6.9	4.3	-	5.8
Heart	5	8.5	9.2	9.4	5.5	-	9.2
Liver	3.9	7	-	-	4	-	7.2
Kidney R	4.5	7.6	5.6	6.1	6.2	13.2	7.2
Kidney L	4.5	7.6	5.5	6.3	6.5	13.2	6.6
Bowel Bag	-	-	11.2	11.7	-	-	9.7
